# Supplementary material for: Identification of Soybean Genes Whose Expression is Affected by the Ensifer fredii HH103 Effector Protein NopP
Source: PubMed Central journal article supplement (PMC6274870; doi:10.3390/ijms19113438), 2018-11-02
Supplement: ijms-19-03438-s001.pdf [file ijms-19-03438-s001.pdf]

**Table S1.** Information of Primers Used.

| No. | Name of primer                 | Primer 5'-3'                                                 | Annotation and Functions                                                                |
|-----|--------------------------------|--------------------------------------------------------------|-----------------------------------------------------------------------------------------|
| 1   | pGWC- <i>NopP</i> 1.8-F-       | CTTCAGATATGTTTCGCGAGG                                        | Clone the fragment containing <i>NopP</i> and putative promoter into pGWC               |
| 2   | pGWC- <i>NopP</i> 1.8-R-       | AACACCGAATGGGTATCGCTC                                        | Clone the fragment containing <i>NopP</i> and putative promoter into pGWC               |
| 3   | <i>NopP</i> Ω <i>Bam</i> H I F | TCGCCATGTACGGTCGGATCCATAGCTCCGATT                            | Site-directed mutagenesis, mutated <i>NopP</i> 1.8 had a <i>Bam</i> H1 restriction site |
| 4   | <i>NopP</i> Ω <i>Bam</i> H I R | AGCGGTTGCCAGCCTAGGTATCGAGCAGGCTAA                            | Site-directed mutagenesis                                                               |
| 5   | Kan- <i>Bam</i> H1-F           | tcaagtAGTAAACTGGATGGCTTTCTTG                                 | Clone Kanamycin fragment into pGWC- <i>NopP</i> 1.8                                     |
| 6   | Kan- <i>Bam</i> H1-R           | tcaagtCTTCAGCATCTTTTACTTTCAC                                 | Clone Kanamycin fragment into pGWC- <i>NopP</i> 1.8                                     |
| 7   | pJQ200SK- <i>NopP</i> Ω-F      | GCTCTAGACTTCAGATATGTTTCGCGAGG                                | Construction of Suicide vector pJQ200SK- <i>NopP</i> Ω to generate HH103Ω <i>NopP</i>   |
| 8   | pJQ200SK- <i>NopP</i> Ω -R     | AACTGCAGAACACCGAATGGGTATCGCTC                                | Construction of Suicide vector pJQ200SK- <i>NopP</i> Ω to generate HH103Ω <i>NopP</i>   |
| 9   | <i>Gm</i> UNK1                 | Fwd-TGGTGCTGCCGCTATTTACTG<br>Rev- GGTGGAAGGAAGTCTAACAAT      | qRT-PCR for validation of <i>Gm</i> UNK1 gene transcription level in Charleston         |
| 10  | <i>Glyma</i> .12G028300        | Fwd- CTTCGGATAGCCTCAGTTG<br>Rev- AACAACCCGTGAAAGGATT         | qRT-PCR for validation of <i>Gm</i> 19g138300 gene transcription level in Charleston    |
| 11  | <i>Glyma</i> .12G030000        | Fwd- ATTGGTTATGATACGATTC<br>Rev- AAAAAGAAAATACAAGACAAAGC     | qRT-PCR for validation of <i>Gm</i> 19g140100 gene transcription level in Charleston    |
| 12  | <i>Glyma</i> .12G031200        | Fwd- ATTAGTATTATCATCTTGGGAGC<br>Rev- CAACACAGGCACACAGCAC     | qRT-PCR for validation of <i>Gm</i> 19g131900 gene transcription level in Charleston    |
| 13  | <i>Glyma</i> .12G036900        | Fwd- TTGAAGATGTGGTTGAATTG<br>Rev- TTGGGAATGAAAAGGAAAAT       | qRT-PCR for validation of <i>Gm</i> 06G181200 gene transcription level in Charleston    |
| 14  | <i>Glyma</i> .12G052400        | Fwd- CTTTTTCGCCCCCTACTT<br>Rev- GCACCACAACGAAGAGAATG         | qRT-PCR for validation of <i>Gm</i> 06G171700 gene transcription level in Charleston    |
| 15  | <i>Glyma</i> .12G055500        | Fwd- ATGTTAAGATGTGCCTGAAT<br>Rev- CGTTACAGTCAGAAATCCATAG     | qRT-PCR for validation of <i>Gm</i> 19g117200 gene transcription level in Charleston    |
| 16  | <i>Glyma</i> .12G073000        | Fwd- ATATTTTTTTTAACCCCTGACGG<br>Rev- ATGTTTGTTTTATTTAGTCCCTC | qRT-PCR for validation of <i>Gm</i> 19g129200 gene transcription level in Charleston    |

**Table S2.** Information of Strains and Vectors.

| Strain                   | Relevant Characteristics                                                                                                                                                                        | Reference                   |
|--------------------------|-------------------------------------------------------------------------------------------------------------------------------------------------------------------------------------------------|-----------------------------|
| <i>Escherichia coli</i>  |                                                                                                                                                                                                 |                             |
| DH5 $\alpha$             | supE44 lacY169 ( 80lacZM15) hsdR17 recA1 endA1 gyrA96 thi-1 relA1                                                                                                                               | Mason et al. 1989           |
| BL21(DE3)                | F- ompT hsdSB (rB- mB-) gal dcm (DE3)                                                                                                                                                           | Studier et al. 1990         |
| <i>Rhizobium strains</i> |                                                                                                                                                                                                 |                             |
| HH103                    | Broad host range bacterium isolated from nodules of Glycine max , Rif <sup>r</sup>                                                                                                              | Dowdle et al. 1985          |
| HH103 $\Omega$ NopP      | HH103 insertion mutated containing an Kanamycin resistance gene insertion at position downstream 8bp of start codon of <i>NopP</i> nucleotide sequence, Rif <sup>r</sup> , Kan <sup>r</sup>     | This work                   |
| <b>Plasmids</b>          |                                                                                                                                                                                                 |                             |
| pGWC                     | Entry clone vector, Cm <sup>r</sup>                                                                                                                                                             | Chen et al. 2006            |
| pJQ200SK                 | Suicide vector used for directed mutagenesis (Gm <sup>r</sup> )                                                                                                                                 | Quandt and Hynes 1993       |
| pJQ200SK-NopP $\Omega$   | A 2.8kb Xba1-Pst1 fragment containing <i>NopP</i> with a Kanamycin resistance gene inserted into downstream 8bp of start codon of <i>NopP</i> the Xba1-PstI site of pJQ200SK (Gm <sup>r</sup> ) | This work                   |
| pRK2013                  | Tra <sup>+</sup> helper plasmid for mobilisation (Kan <sup>r</sup> )                                                                                                                            | Figurski and Helinski, 1979 |

Note: Rifampicin(Rif<sup>r</sup>); Kanamycin (Kan<sup>r</sup>); Chloramphenicol (Cm<sup>r</sup>); Gentamicin (Gm<sup>r</sup>).
